# Supplementary material
Source: publisher site journal article supplement (https://www.spandidos-publications.com/3732/downloadSupplementary)

Figure S1. Effect of Wnt5a knockdown and/or IR on expression of  $\beta$ -catenin in H1650 and A549 NSCLC cell lines. Wnt5a, wingless-type protein 5a; si, small interfering; IR, irradiation.

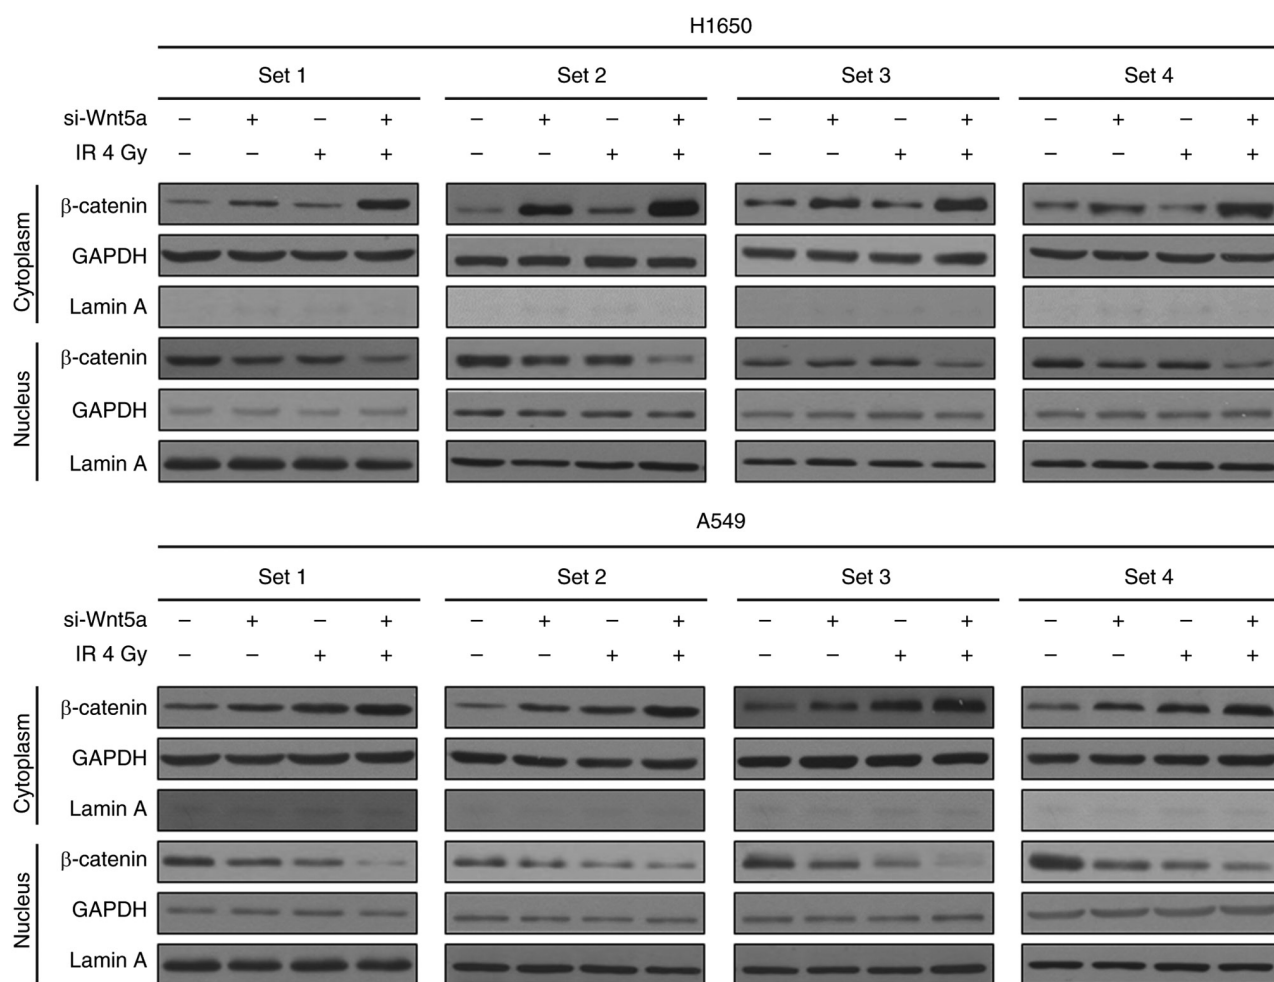

Figure S2. Effect of Wnt5a overexpression and/or IR on the expression of  $\beta$ -catenin in H1650 and A549 NSCLC cell lines. Wnt5a, wingless-type protein 5a; IR, irradiation.

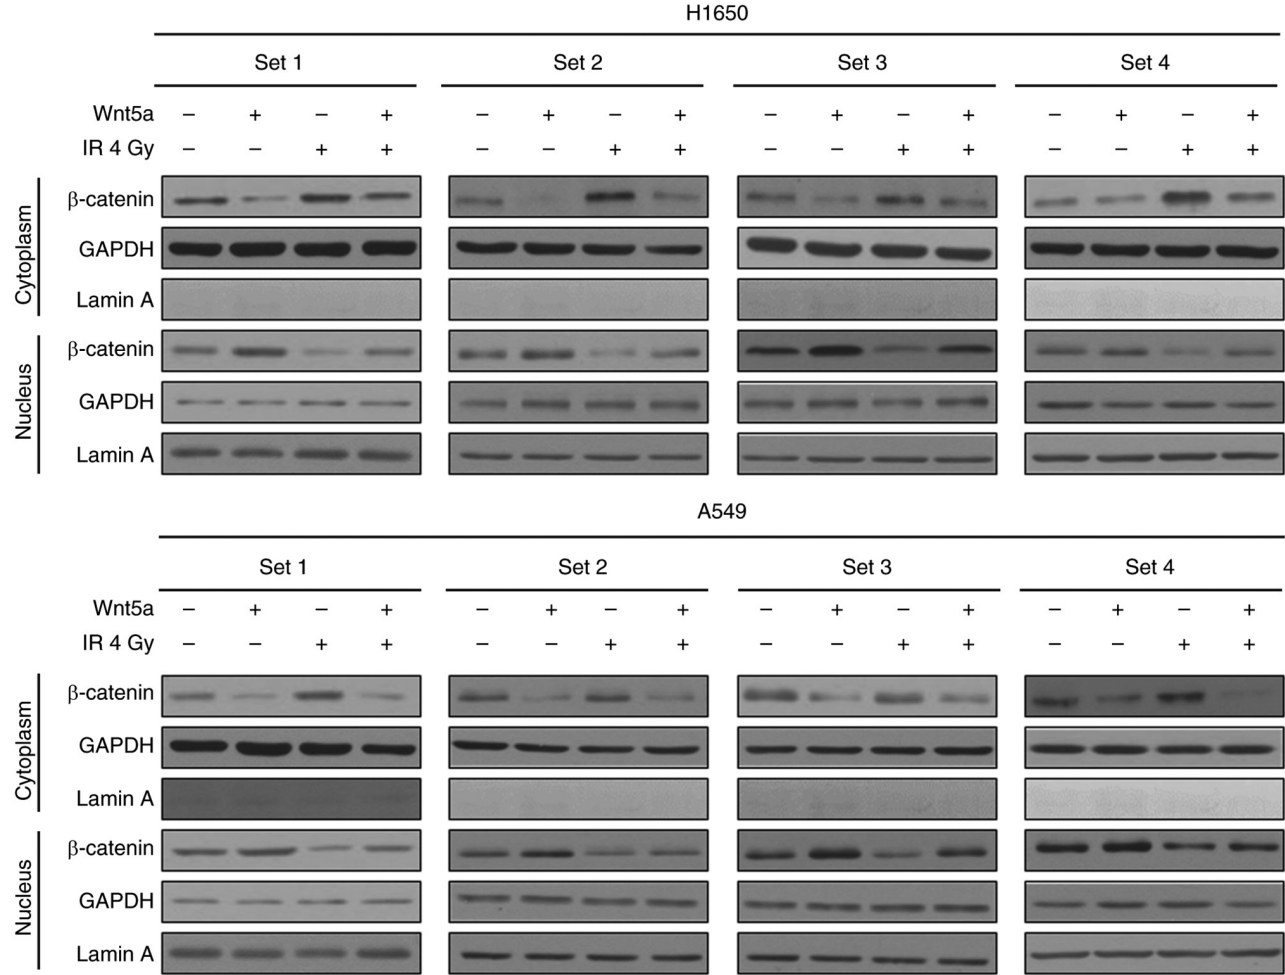

Figure S3. Establishment of  $\beta$ -catenin silencing by siRNA transfection in H1650 and A549 cells. (A) Knockdown of  $\beta$ -catenin expression by siRNA in transfected H1650 and A549 cells was verified by immunoblotting and (B) reverse-transcription quantitative PCR with GAPDH as a loading control. A non-targeting siRNA (scramble) was used as a negative control. Data are presented as the mean  $\pm$  SD of three independent repeats. \*\*\* $P$ <0.001 vs. control. si, small interfering; OD, optical density.

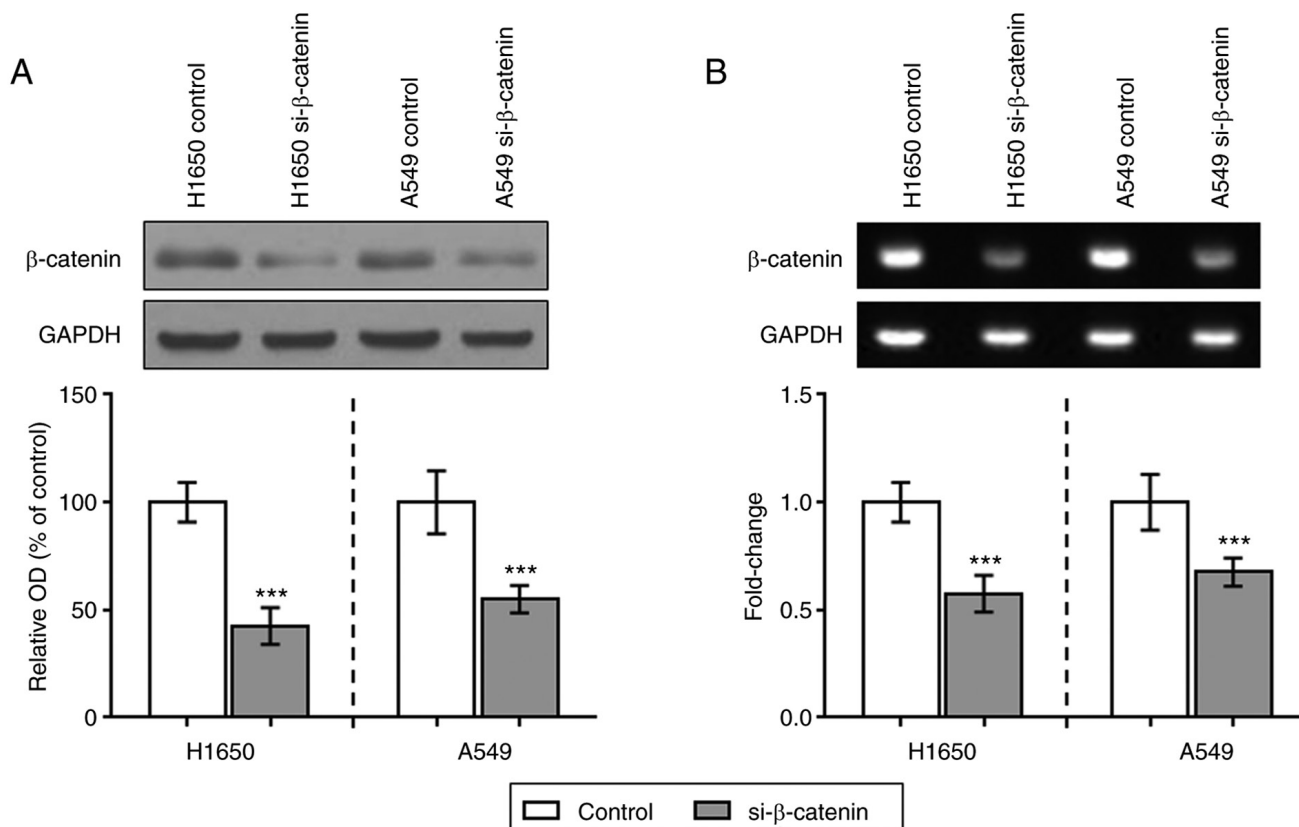

Supplement: Supplementary file 1 [file downloadSupplementary]
